1 **Comparison of haemoglobin concentration measurements using HemoCue-301 and**  
2 **Sysmex XN-Series 1500: a survey among anaemic Gambian infants aged 6-12 months**

3

4 Mamadou Bah, MSc<sup>1,2</sup>, Hans Verhoef, PhD<sup>2</sup>, Abdou Camara<sup>1</sup>, SEN, Morris Nden Ngom<sup>1</sup>,  
5 SEN, Demba Jallow<sup>1</sup>, SEN, Kebba Bajo<sup>1</sup>, Foday Bah<sup>1</sup>, Maarten Pleij<sup>2</sup> BSc, Maaïke Klappe<sup>2</sup>  
6 BSc, Alasana Saidykhan<sup>1</sup>, BSc, Emmanuel Okoh, MBBS, MPH<sup>1</sup>, Abdoulie Bah, BSc<sup>1</sup>, Carla  
7 Cerami, MD, PhD<sup>1\*</sup>

8

9 *<sup>1</sup>Medical Research Council (MRC) Unit The Gambia at London School of Hygiene & Tropical*  
10 *Medicine (LSHTM), PO Box 273, Fajara, The Gambia*

11 *<sup>2</sup>Division of Human Nutrition and Health, Wageningen University, PO Box 17, 6700 AA*  
12 *Wageningen, The Netherlands*

13 *\*Correspondence to: Dr Carla Cerami at the MRC Unit The Gambia @ LSHTM, Atlantic*  
14 *Boulevard, Fajara, Banjul, The Gambia Email: [carla.cerami@lshtm.ac.uk](mailto:carla.cerami@lshtm.ac.uk); Tel: +220-*  
15 *7875756*

16 **ABSTRACT**

17 **Background & Aims:** In low-income countries, point-of-care photometers are used in the  
18 screening and management of anaemia in individuals, but also in the assessment of  
19 population iron status when evaluating efficacy of intervention studies or public health  
20 interventions. We aimed to evaluate the accuracy of a commonly used photometer,  
21 HemoCue-301, in determining haemoglobin concentration among anaemic children aged 6-  
22 12 months in a field setting in rural Africa.

23 **Methods:** This report concerns a secondary analysis of data from Gambian infants being  
24 screened for an ongoing randomized controlled trial. In those found to be anaemic by  
25 HemoCue-301, haemoglobin concentration was measured by Sysmex XN-1500, an  
26 automated haematology analyser that was used as a reference. Passing-Bablok regression  
27 analysis was used to estimate the regression constant (systematic deviation between two  
28 measurement methods that remain consistent across the range of measurements) and  
29 proportional bias (systematic deviation between two measurement methods that change in  
30 magnitude relative to the value being measured).

31 **Results:** Analysis was based on 227 participants. There was strong evidence of absolute  
32 bias among moderately anaemic participants (haemoglobin concentration at 8.0g/dL)  
33 (absolute bias: 1.12g/dL; 95% CI: 0.91 to 1.37g/dL; proportional bias: 14.0%; 95% CI: 11.4%  
34 to 17.1%) in haemoglobin concentrations measured by HemoCue-301 compared to those  
35 measured by Sysmex XN-Series1500. Bias was marginal at haemoglobin concentration of  
36 11.0g/dL (absolute bias: -0.08g/dL; 95% CI: -0.18 to 0.07g/dL; proportional bias: -7.3%; 95%  
37 CI: -6.5% to 0.6%).

38 **Conclusion:** Haemoglobin measurements by HemoCue-301 seem substantially biased in  
39 participants with haemoglobin less than 8.0g/dL.

40 **Key words:** Diagnostic techniques, haematologic; haemoglobin, anaemia; point-of-care  
41 systems; child; Gambia

## 42 1. INTRODUCTION

43 Accurate measurement of haemoglobin concentrations is important in the screening and  
44 management of anaemia in individuals, but also in the assessment of population iron status  
45 in surveys to evaluate the efficacy of intervention studies or public health interventions.  
46 Automated haematology analysers are generally considered the reference standard. These  
47 analysers are expensive and require specific ambient temperatures, cold storage for  
48 reagents, and a stable source of electricity, which poses challenges in field settings (1). To  
49 address these challenges, various battery-operated point-of-care photometers have been  
50 introduced. They rely on either pooled or single capillary blood samples, making them  
51 convenient for use in field settings and are widely used for country-wide anaemia prevalence  
52 studies (2).

53

54 One such photometer is the HemoCue-301 (HemoCue, Ängelholm, Sweden), which was  
55 specifically developed to withstand challenging environments and does not utilise any  
56 hygroscopic ingredients (3). The HemoCue-301 utilises a double-wavelength method,  
57 measuring the absorbance of whole blood at 506nm the Hb/HbO<sub>2</sub> isosbestic point (i.e., the  
58 wavelength where Hb and HbO<sub>2</sub> have the same absorbance or intensity), and at a  
59 wavelength of 880nm to compensate for turbidity. However, this technique is sensitive to  
60 oxygen, resulting in a 1.3% increase in measured haemoglobin concentration per minute  
61 the sample is left in open air (4). Therefore, readings must be completed within 20-30  
62 seconds to ensure accuracy (3).

63

64 Despite their benefits, variability in haemoglobin measurements between these point-of-care  
65 devices and automated haematology analysers has been reported (5). A systematic review  
66 of 8 studies revealed higher haemoglobin concentration measurements of capillary blood  
67 using HemoCue-301 compared to measurement of venous blood in automated haematology

68 analysers (4), with differences ranging from 0.5 to 6.1 g/L (4). However, most of these  
69 studies determined the difference in haemoglobin measurement between the techniques  
70 using Bland-Altman analysis (6–14). Unlike Bland-Altman analysis, Passing-Bablok  
71 regression analysis is a non-parametric method that does not assume constant  
72 measurement errors between methods and is robust against outliers (15).

73

74 We aimed to evaluate the accuracy of the HemoCue-301 in determining haemoglobin  
75 concentration among anaemic children aged 6-12 months in a field setting in rural Africa. As  
76 a reference, we used the Sysmex XN-1500 (Sysmex Corporation, Kobe, Japan), an  
77 automated haematology analyser that utilises a cyanide-free sodium lauryl sulphate reagent  
78 to lyse red blood cells, which, once released, forms a stable-coloured complex that is then  
79 measured photometrically (16).

80

## 81 **2. Materials & Methods**

82 This study contains an analysis of baseline data obtained from an ongoing efficacy trial of  
83 haem iron versus ferrous sulphate in infants aged 6-12 months (17). The trial received  
84 ethical approval from the Scientific Coordinating Committee of the Medical Research  
85 Council (MRC) Unit The Gambia, the Joint Gambia Government MRC Ethics Committee,  
86 and the Ethics Committee at the London School of Hygiene and Tropical Medicine  
87 (LEO27648) and adheres to the principles of Good Clinical Practice, with oversight from a  
88 Data Safety and Monitoring Board, and will be subject to monitoring by the Clinical Trials  
89 Office at the MRCG@LSHTM. The trial is registered with the Pan African Clinical Trial  
90 Registry (PACTR202210523178727) at [www.pactr.org](http://www.pactr.org).

91

### 92 **2.1 Sample collection**

93 Enrolment of participants started on the 11th of May 2023 in Jara West and Kiang East of  
94 The Gambian and concluded on the 1st of November 2023. Potential participants were  
95 recruited from vaccination clinics or in their respective communities. After obtaining consent  
96 from parents/guardians, capillary blood samples were collected in the field by a trained  
97 nurse. While seated, the participant's finger was cleaned, and non-fasting blood was  
98 collected by pricking the thumb with a lancet (Microtainer Contact-Activated Lancet, Becton-  
99 Dickinson, Franklin Lakes, NJ, USA). The initial capillary droplet was removed, and the  
100 second droplet was used to fill the microcuvette, ensuring that no air bubbles were  
101 introduced. Any excess blood on the sides of the microcuvette was wiped, and haemoglobin  
102 concentration was measured immediately by inserting the microcuvette into the HemoCue-  
103 301 photometer. Children with anaemia (haemoglobin <11.0g/dL by HemoCue-301) were  
104 invited for further screening and haemoglobin assessment was repeated using the reference  
105 method. For each participant, a 0.5mL venous blood sample was collected by a nurse into  
106 K<sub>2</sub>EDTA tubes (BD microtainer, reference number 365975), and samples were kept  
107 between 4°C–8°C until transferred to a central laboratory, where haemoglobin concentration  
108 was assessed within 4 hours of initial blood draw using a Sysmex XN-1500 analyser. Study  
109 data were collected and managed using REDCap electronic data capture tools hosted at  
110 MRC Unit The Gambia (18).

111

## 112 **2.2 Quality control**

113 The HemoCue-301 is factory-calibrated against international reference samples and no  
114 further calibration is possible by the end user (19). Weekly quality control checks were done  
115 for the HemoCue-301 utilising the control blood samples purchased for use with the Sysmex  
116 machine (XN Check, L1 catalogue number; 213484, L2 catalogue number; 213485, L3  
117 catalogue number; 213486). No quality control failures were noted during the trial. The  
118 Sysmex XN-Series 1500 (Sysmex Corporation, Japan) instrument is housed in an

119 accredited Good Clinical Laboratory Practice (GCLP) laboratory at MRCG at LSHTM at the  
120 Keneba field station. Daily quality checks and controls were conducted. All sample analyses  
121 were carried out by a trained scientific officer to ensure the accuracy and reliability of the  
122 data throughout the study.

123

### 124 **2.3 Statistical analysis**

125 The statistical analysis was conducted in RStudio version 3.0. Passing-Bablok regression,  
126 a non-parametric method, was used to determine potential absolute and proportional bias  
127 using the Method Comparison Regression (mcr) package. Bias refers to non-random errors  
128 between measurements obtained from two different methods. Proportional bias refers to a  
129 systematic error in which the magnitude of the bias is directly proportional to the true value  
130 of the variable being measured. Unlike traditional linear regression, the Passing-Bablok  
131 regression method is insensitive to outliers and does not assume normal distribution,  
132 constant variance, or a linear relationship (15). We defined absolute and proportional bias  
133 when the confidence intervals excluded 0 and 1 for the intercept or the slope respectively.  
134 A difference of  $\pm 7\%$  between methods as recommended by the College of American  
135 Pathologists and the Westgard Clinical Laboratory Improvement Amendments was  
136 considered acceptable (20).

137

## 138 **3. RESULTS**

139 A total of 227 participants had their haemoglobin assessed using both the HemoCue-301  
140 and Sysmex XN-Series 1500 and were included in the analysis. The participants had a mean  
141 age of 7.5 months (SD: 1.6 months); 52% were female. Of 227 participants identified as  
142 anaemic according to the HemoCue-301, 17 were found to be not anaemic using the  
143 Sysmex haematology analyser. One participant was classified as severely anaemic

144 (haemoglobin <7.0 g/dl) according to the Sysmex haematology analyser but not the  
145 HemoCue-301.

146

147 The median haemoglobin concentrations for HemoCue-301 and Sysmex XN-Series were  
148 10.2 g/dL (IQR: 9.8, 10.7 g/dL) and 9.8 g/dL (IQR:9.2, 10.4 g/dL), respectively. For severe  
149 anaemia (haemoglobin concentration at 6.5 g/dL), Hemocue measurements showed an  
150 absolute bias of 1.72 g/dL (95% CI: 1.37 to 2.10 g/dL) and a proportional bias of 26.5% (95%  
151 CI: 21.1% to 32.3%). Moderate anaemia (haemoglobin concentration at 8.0 g/dL) showed  
152 an absolute bias of 1.12 g/dL (95% CI: 0.91 to 1.37 g/dL) and a proportional bias of 14.0%  
153 (95% CI: 11.4% to 17.1%), while mild anaemia cases (haemoglobin concentration <10.0  
154 g/dL) showed an absolute bias of 0.32 g/dL (95% CI: 0.26 to 0.42 g/dL) and a proportional  
155 bias of 3.2% (95% CI: 2.6% to 4.2%). Bias was marginal at haemoglobin concentration of  
156 11.0 g/dL (absolute bias: -0.08 g/dL; 95% CI: -0.18 to 0.07; proportional bias: -7.3%; 95%  
157 CI: -6.5 to 0.6). A modest positive correlation coefficient of 0.31, as indicated by Kendall's  
158 tau, indicates limited agreement between the measurement methods.

159

#### 160 **4. DISCUSSION**

161 We demonstrated that haemoglobin measurements between HemoCue-301 and the  
162 Sysmex XN-1500 vary across different haemoglobin concentrations and the magnitude of  
163 bias is inversely proportional to haemoglobin concentration. There was strong evidence of  
164 a absolute bias in haemoglobin concentrations above the acceptable difference of  $\pm 7\%$  set  
165 by the College of American Pathologists and Westgard Clinical Laboratory Improvement  
166 Amendments in moderate and severely anaemic participants (20).

167

168 The diagnostic accuracy of HemoCue-301 compared to automated hematology analyzers  
169 has been examined in several studies. While some studies have reported acceptable

170 differences within  $\pm 7\%$ , others have shown higher difference(4,21). Our study indicated that  
171 HemoCue-301 measurements were 26.5% higher than the Sysmex values at a hemoglobin  
172 concentration of 6.5 g/dL with an absolute bias of 1.72 g/dL much higher than the acceptable  
173  $\pm 7\%$ . Among participants with a hemoglobin concentration of 8.0 g/dL, 14.0% showed an  
174 absolute bias of 1.12 g/dL, while those with a hemoglobin concentration of 11.0 g/dL showed  
175 marginal or non-existent bias. Similarly, a study conducted in Laotian children reported a  
176 higher bias in anaemic compared to non-anaemic children (22). In blood donors, no bias  
177 was observed at a haemoglobin concentration of 12.0 g/dl when compared to the WHO  
178 reference standard haemoglobin-cyanide technique (11). A systematic review of 8 studies  
179 among adults indicated higher HemoCue-301 haemoglobin concentration measurements  
180 compared to automated analysers. This study concluded that the difference fell within the  
181 acceptable limit of  $\pm 7\%$  set by the College of American Pathologists and Westgard Clinical  
182 Laboratory Improvement Amendments (4). However, it is important to acknowledge that  
183 differences in haemoglobin measurements vary between methods at different  
184 concentrations, as demonstrated by our study, which was not accounted for in this study.

185

186 The HemoCue-301 operates on spectrophotometric principles, where the absorbance of  
187 light passing through a blood sample is directly proportional to the concentration of  
188 haemoglobin at the Hb/HbO<sub>2</sub> isosbestic point. Due to the stringent adherence to the  
189 haemoglobin measurement protocol within our clinical trial, the observed higher  
190 haemoglobin concentrations, particularly in anaemic children, are likely attributable to device  
191 bias arising from increased absorbance at lower haemoglobin concentrations rather than  
192 preanalytical errors. In contrast, a study among women in Peru has indicated lower  
193 haemoglobin concentrations measured by HemoCue-301 compared to automated  
194 analysers, with 50% of these women classified as anaemic according to HemoCue-301 (23).  
195 However, in our analysis, only 7.4% of participants were misclassified as anaemic by the



196 HemoCue-301, while they were classified as normal (haemoglobin concentrations greater  
197 than 11 g/dL) according to the Sysmex XN-1500.

198

199 According to WHO guidelines, paediatric blood transfusion should be performed on patients  
200 with haemoglobin less than 4.0 g/dl with clinical signs of severity (24). However, few facilities  
201 in sub-Saharan countries have access to reliable haemoglobin tests with a turnaround time  
202 between 1 and 8 hours [5] As a result, around 40-65% of requested transfusions are based  
203 on clinical judgment, such as severe pallor (5). This clinical judgment is often inaccurate in  
204 identifying severe anaemia (haemoglobin less than 5.0 g/dl), leading to unnecessary  
205 transfusions (25,26). This does not only expose children to transfusion-related risks but may  
206 also contribute to blood scarcity for patients who are most in need (26,27). Therefore, the  
207 ability to provide rapid diagnosis of severe anaemia is critical for life-saving interventions  
208 and the prioritisation of blood units for those in most need. A study conducted in Kenya,  
209 Tanzania, and Uganda revealed that a delay in blood transfusion for severely anaemic  
210 children within the first 8 hours resulted in a 52% mortality rate, with 90% of these deaths  
211 occurring within the initial 2.5 hours(28). This outcome was associated with insufficient blood  
212 units, emphasising the importance of managing and prioritising the already scarce blood  
213 resources to prevent avoidable deaths (28). Conversely, in a Kenyan hospital, children  
214 receiving transfusion on the same day, compared to the following day, were associated with  
215 a 42% reduction in mortality (29). In the TRACT trial, where participants aged between 2 to  
216 12 months were randomised to either immediate or triggered transfusion, active hemoglobin  
217 measurement by the HemoCue-301 method in the control group resulted in 49.0% of  
218 children receiving timely transfusions. Additionally, there was evidence of lower mortality,  
219 perhaps due to the active hemoglobin monitoring every 8 hours in the first 24 hours and at  
220 48 hours (30). However, our study showed that this method tends to overestimate

221 hemoglobin concentration, particularly in participants with moderate to severe anaemia,  
222 potentially resulting in children who require a blood transfusion not receiving it.

223

224 The WHO is currently involved in ongoing research to comprehensively understand  
225 preanalytical and analytical factors influencing haemoglobin measurement using these  
226 point-of-care devices. This research aims to inform the development of new guidelines in  
227 this area (31) and our study will contribute to the existing evidence that can be utilised in  
228 these guidelines' development. This study is part of an ongoing clinical trial, thus ensuring  
229 stringent monitoring and adherence to trial protocols throughout the blood sampling process  
230 and haemoglobin measurements. This study has several limitations as it was a secondary  
231 data analysis using a convenience sampling method. Consequently, the findings may not  
232 be generalisable to rural Gambian children aged between 6 and 12 months. Additionally,  
233 capillary and venous blood sampling for haemoglobin measurement were not performed on  
234 the same day. The retrospective nature of our study limited our ability to explore the potential  
235 impact of different blood sample types (venous vs capillary) on haemoglobin concentration  
236 measurements. Furthermore, our study design did not allow for a direct comparison between  
237 point-of-care tests and automated haematology analysers regarding anaemia prevalence.  
238 This is because only children identified as anaemic by HemoCue-301 underwent  
239 haemoglobin measurements using the automated analyser.

240

## 241 **5. Conclusion**

242 Our study indicated that bias due to HemoCue-301 depends on the actual Hb concentration,  
243 and seems unacceptably high at Hb values below 8.0 g/dL. While this method may offer  
244 convenience in field surveys for estimating anaemia prevalence, caution is required when  
245 using it for a screen-and-treat approach.

246

247

248 **Declarations**

249 *Acknowledgements*

250 We thank the IDeA3 study team at MRCG@LSHTM for their dedicated support, the MRCG  
251 Keneba laboratory, the data management team and the MRCG Clinical Trial Unit. We also  
252 thank the participants and communities of Kiang East and Jarra West.

253

254 *Authors' contributions*

255 MB conceived this paper, and contributed to the analysis, writing of the original paper,  
256 reviewing, and editing and coordinated the study as part of his PhD, overseeing all aspects  
257 of study implementation. CC conceived the overall trial idea and acquisition of funding, and  
258 design and is the overall principal investigator, contributed to the writing of the paper,  
259 reviewing, editing and supervising MB. HV contributed to the study design, sample size  
260 calculation and statistical analysis plan, writing of the paper, reviewing, and editing and co-  
261 supervised MB. AMP contributed to the study idea, design, writing of the paper, reviewing,  
262 and editing. EO is the research clinician on the trial contributed to data collection and  
263 reviewed and edited the paper. AC, MNG, DJ, KB, AS, MK, and MP contributed to data  
264 collection reviewing and editing of the paper. AB is the data manager and contributed to the  
265 reviewing and editing of the paper.

266

267 *Funding*

268 This study was funded by a grant from the UK Research & Innovation (UKRI) to the Medical  
269 Research Council Unit The Gambia at London School of Hygiene & Tropical Medicine (grant  
270 reference: MR/R023360/1). CC, AMP, EO, AB, AC, MNG, DJ, KB and AS are funded  
271 through MRCG@LSHTM. MB is partially funded through MRCG@LSHTM, Wageningen  
272 University and MR/R023360/1. HV, MK, and MP are funded by Wageningen University.

273

274 *Role of the funding source*

275 The funder had no role in the design or implementation of the study.

276

277 *Competing interests*

278 There is no competing interest to disclose.

279

280 *Authors and Affiliations*

281 Mr. Mamadou Bah (PhD Candidate and Sub-Investigator, Affiliation: MRC Unit The Gambia  
282 @ LSHTM & Wageningen University, Division of Human Nutrition and Health, The  
283 Netherlands)

284 Dr. Carla Cerami (Principal Investigator and Research Group Lead: Iron, Infection and  
285 Anaemia; Affiliation: MRC Unit The Gambia @ LSHTM Research Group)

286 Prof. Andrew M Prentice (Sub-Investigator, Nutrition and Planetary Health Theme Leader;  
287 Affiliation: MRC Unit The Gambia @ LSHTM)

288 Dr. Hans Verhoef (Sub-Investigator and Trial Statistician, Affiliation: Wageningen University,  
289 Division of Human Nutrition and Health, The Netherlands)

290 Dr Emmanuel Okoh (Research Clinician: MRC Unit The Gambia @ LSHTM Research  
291 Group)

292 Abdoulie Bah, (Data support assistant: MRC Unit The Gambia @ LSHTM Research Group)

293 Alasana Saidu Khan, (Scientific Officer: MRC Unit The Gambia @ LSHTM Research Group)

294 Abdou Camara, (Nurse Coordinator: MRC Unit The Gambia @ LSHTM Research Group)

295 Kebba Bajo, (Field Coordinator: MRC Unit The Gambia @ LSHTM Research Group)

296 Morris Ndene Ngom, (Research Nurse: MRC Unit The Gambia @ LSHTM Research Group)

297 Demba Jallow, (Research Nurse: MRC Unit The Gambia @ LSHTM Research Group)

298 Foday Bah, (Field Supervisor: MRC Unit The Gambia @ LSHTM Research Group)

299 Maaïke Klappe (MSc student, Affiliation: Wageningen University, Division of Human  
300 Nutrition and Health, The Netherlands)

301 Maarten Pleij (MSc student, Affiliation: Wageningen University, Division of Human Nutrition  
302 and Health, The Netherlands)

303

304

305

## 306 References

307

- 308 1. Garcia-Casal MN, Dary O, Jefferds ME, Pasricha SR. Diagnosing anemia:  
309 Challenges selecting methods, addressing underlying causes, and implementing  
310 actions at the public health level. *Ann N Y Acad Sci* [Internet]. 2023 Jun 1 [cited  
311 2023 Nov 21];1524(1):37–50. Available from:  
312 <https://onlinelibrary.wiley.com/doi/full/10.1111/nyas.14996>  
313
- 314 2. Srivastava T, Negandhi H, Neogi SB, Sharma J, Saxena R. Methods for Hemoglobin  
315 Estimation: A Review of "What Works. *J Hematol Transfus*. 2014;2(3):1028.  
316
- 317 3. HemoCue. HemoCue® Hb 301. 2024.  
318
- 319 4. Whitehead RD, Mei Z, Mapango C, Jefferds MED. Methods and analyzers for  
320 hemoglobin measurement in clinical laboratories and field settings. *Ann N Y Acad*  
321 *Sci* [Internet]. 2019 [cited 2024 Jan 30];1450(1):147. Available from:  
322 </pmc/articles/PMC6709845/>  
323
- 324 5. Uyoga S, George EC, Bates I, Olupot-Olupot P, Chimalizeni Y, Molyneux EM, et al.  
325 Point-of-care haemoglobin testing in African hospitals: a neglected essential  
326 diagnostic test. [cited 2023 Nov 21]; Available from:  
327 [www.ekfdiagnostics.com/diaspect.html](http://www.ekfdiagnostics.com/diaspect.html)  
328
- 329 6. Jaggernath M, Naicker R, Madurai S, Brockman MA, Ndung'u T, Gelderblom HC.  
330 Diagnostic Accuracy of the HemoCue Hb 301, STAT-Site MHgb and URIT-12 Point-  
331 of-Care Hemoglobin Meters in a Central Laboratory and a Community Based Clinic  
332 in Durban, South Africa. *PLoS One* [Internet]. 2016 Apr 1 [cited 2023 Nov 21];11(4).  
333 Available from: <https://pubmed.ncbi.nlm.nih.gov/27046200/>  
334
- 335 7. Lardi AM, Hirst C, Mortimer AJ, McCollum CN. Evaluation of the HemoCue® for  
336 measuring intra-operative haemoglobin concentrations: A comparison with the  
337 Coulter Max-M®. *Anaesthesia*. 1998;53(4):349–52.  
338
- 339 8. Rechner IJ, Twigg A, Davies AF, Imong S. Evaluation of the HemoCue compared  
340 with the Coulter STKS for measurement of neonatal haemoglobin. *Arch Dis Child*  
341 *Fetal Neonatal Ed*. 2002;86(3).  
342
- 343 9. Karakochuk CD, Janmohamed A, Whitfield KC, Barr SI, Vercauteren SM, Kroeun H,  
344 et al. Evaluation of two methods to measure hemoglobin concentration among  
345 women with genetic hemoglobin disorders in Cambodia: A method-comparison  
346 study. *Clinica Chimica Acta*. 2015 Feb 20;441:148–55.  
347
- 348 10. Morris SS, Ruel MT, Cohen RJ, Dewey KG, De La Brière B, Hassan MN. Precision,  
349 accuracy, and reliability of hemoglobin assessment with use of capillary blood. *Am J*  
350 *Clin Nutr*. 1999 Jun 1;69(6):1243–8.  
351
- 352 11. Morris LD, Osei-Bimpong A, McKeown D, Roper D, Lewis SM. Evaluation of the  
353 utility of the HemoCue 301 haemoglobinometer for blood donor screening. *Vox*  
354 *Sang*. 2007 Jul;93(1):64–9.  
355

- 356 12. Karakochuk CD, Hess SY, Moorthy D, Namaste S, Parker ME, Rappaport AI, et al.  
357 Measurement and interpretation of hemoglobin concentration in clinical and field  
358 settings: a narrative review. *Ann N Y Acad Sci* [Internet]. 2019 Aug 1 [cited 2023  
359 Dec 4];1450(1):126–46. Available from:  
360 <https://onlinelibrary.wiley.com/doi/full/10.1111/nyas.14003>  
361
- 362 13. Getaneh Z, Woldu B, Sitotaw C, Melku M. Comparison of hemoglobin levels by  
363 HemoCue301+ and Sysmex KX-21N at University of Gondar Hospital, Northwest  
364 Ethiopia, 2020. *Clin Lab* [Internet]. 2022 [cited 2023 Dec 4];68(11):2316–24.  
365 Available from: <https://pubmed.ncbi.nlm.nih.gov/36378003/>  
366
- 367 14. Jain A, Chowdhury N. Comparison of the accuracy of capillary hemoglobin  
368 estimation and venous hemoglobin estimation by two models of HemoCue against  
369 automated cell counter hemoglobin measurement. *Asian J Transfus Sci* [Internet].  
370 2020 Jan 1 [cited 2023 Dec 4];14(1):49. Available from: </pmc/articles/PMC7607980/>  
371
- 372 15. Bilić-Zulle L. Comparison of methods: Passing and Bablok regression. *Biochem Med*  
373 (Zagreb) [Internet]. 2011 [cited 2023 Dec 5];21(1):49–52. Available from:  
374 <https://pubmed.ncbi.nlm.nih.gov/22141206/>  
375
- 376 16. Hill VL, Simpson VZ, Higgins JM, Hu Z, Stevens RA, Metcalf JA, et al. Evaluation of  
377 the Performance of the Sysmex XT-2000i Hematology Analyzer With Whole Bloods  
378 Stored at Room Temperature. *Lab Med* [Internet]. 2009 Dec [cited 2024 Jan  
379 30];40(12):709. Available from: </pmc/articles/PMC2860627/>  
380
- 381 17. Bah M, Verhoef H, Okoh E, Prentice A, Cerami C. Haem iron versus ferrous iron  
382 salts to treat iron deficiency anaemia in Gambian children: protocol for randomised  
383 controlled trial {1}. 2024;  
384
- 385 18. Harris PA, Taylor R, Thielke R, Payne J, Gonzalez N, Conde JG. Research  
386 Electronic Data Capture (REDCap) - A metadata-driven methodology and workflow  
387 process for providing translational research informatics support. *J Biomed Inform*  
388 [Internet]. 2009 Apr [cited 2024 Mar 8];42(2):377. Available from:  
389 </pmc/articles/PMC2700030/>  
390
- 391 19. HemoCue. Hb 301 System | Robust Blood Testing Set | HemoCue America  
392 [Internet]. 2023 [cited 2023 Dec 14]. Available from: <https://www.hemocue.us/hb-301/>  
393  
394
- 395 20. WestgardQC. CLIA Requirements for Analytical Quality - Westgard [Internet]. 2023  
396 [cited 2024 Apr 16]. Available from: <https://www.westgard.com/clia-a-quality/quality-requirements/125-clia.html>  
397  
398
- 399 21. Fothergill A, Crider KS, Johnson CB, Raj MP, Guetterman HM, Bose B, et al.  
400 Comparison of Anemia Screening Methods Using Paired Venous Samples in  
401 Women of Reproductive Age in Southern India. *J Nutr* [Internet]. 2022 Dec 1 [cited  
402 2024 Apr 16];152(12):2978. Available from: </pmc/articles/PMC9840000/>  
403
- 404 22. Hinnouho GM, Barffour MA, Wessells KR, Brown KH, Kounnavong S,  
405 Chanhthavong B, et al. Comparison of haemoglobin assessments by HemoCue and  
406 two automated haematology analysers in young Laotian children. *J Clin Pathol*



- 407 [Internet]. 2018 [cited 2023 Nov 21];71(6):532. Available from:  
408 /pmc/articles/PMC5969348/  
409
- 410 23. Alarcón-Yaquetto DE, Rueda-Torres L, Bailon N, Barreto PV, Málaga G. Accuracy of  
411 HemoCue301 portable hemoglobin analyzer for anemia screening in capillary blood  
412 from women of reproductive age in a deprived region of Northern Peru: An on-field  
413 study. PLoS One [Internet]. 2023 Oct 25 [cited 2024 Mar 8];18(11). Available from:  
414 /pmc/articles/PMC10645325/  
415
- 416 24. WHO. Guidelines for the management of common childhood illnesses; Pocket book  
417 of Hospital Care for Children [Internet]. 2nd Edition. 2013 [cited 2023 Nov 28]. 1–438  
418 p. Available from: <https://www.who.int/publications/i/item/978-92-4-154837-3>  
419
- 420 25. Olupot-Olupot P, Prevatt N, Engoru C, Nteziyaremye J, Amorut D, Chebet M, et al.  
421 Open Peer Review Evaluation of the diagnostic accuracy and cost of different  
422 methods for the assessment of severe anaemia in hospitalised children in Eastern  
423 Uganda [version 2; referees: 3 approved]. 2019 [cited 2023 Dec 5]; Available from:  
424 <https://doi.org/10.12688/wellcomeopenres.14801.1>  
425
- 426 26. Brehm R, South A, George EC. Use of point-of-care haemoglobin tests to diagnose  
427 childhood anaemia in low- and middle-income countries: A systematic review.  
428 Tropical Medicine & International Health [Internet]. 2023 [cited 2023 Dec 14];  
429 Available from: <https://onlinelibrary.wiley.com/doi/full/10.1111/tmi.13957>  
430
- 431 27. Opoka RO, Ssemata AS, Oyang W, Nambuya H, John CC, Tumwine JK, et al. High  
432 rate of inappropriate blood transfusions in the management of children with severe  
433 anemia in Ugandan hospitals. BMC Health Serv Res [Internet]. 2018 Jul 18 [cited  
434 2023 Dec 5];18(1):1–9. Available from:  
435 <https://bmchealthservres.biomedcentral.com/articles/10.1186/s12913-018-3382-5>  
436
- 437 28. Kiguli S, Maitland K, George EC, Olupot-Olupot P, Opoka RO, Engoru C, et al.  
438 Anaemia and blood transfusion in African children presenting to hospital with severe  
439 febrile illness. 2015 [cited 2023 Dec 5]; Available from:  
440 <http://dx.doi.org/10.1186/s12916-014-0248-5>.  
441
- 442 29. Thomas J, Ayieko P, Ogero M, Gachau S, Makone B, Nyachiro W, et al. Blood  
443 Transfusion Delay and Outcome in County Hospitals in Kenya. Am J Trop Med Hyg  
444 [Internet]. 2017 Feb 2 [cited 2023 Dec 5];96(2):511. Available from:  
445 /pmc/articles/PMC5303061/  
446
- 447 30. Maitland K, Kiguli S, Olupot-Olupot P, Engoru C, Mellewa M, Goncalves PS, et al.  
448 Transfusion in African Children with Uncomplicated Severe Anemia. N Engl J Med  
449 [Internet]. 2019 Aug 8 [cited 2023 Dec 4];381(5):407. Available from:  
450 /pmc/articles/PMC7611152/  
451
- 452 31. WHO. Call for authors - Developing a systematic review on accuracy and precision  
453 of data collection and analytical methods for haemoglobin assessment in  
454 populations [Internet]. 2023 [cited 2023 Dec 7]. Available from:  
455 [https://www.who.int/news-room/articles-detail/call-for-authors-developing-a-](https://www.who.int/news-room/articles-detail/call-for-authors-developing-a-systematic-review-on-accuracy-and-precision-of-data-collection-and-analytical-methods-for-haemoglobin-assessment-in-populations)  
456 [systematic-review-on-accuracy-and-precision-of-data-collection-and-analytical-](https://www.who.int/news-room/articles-detail/call-for-authors-developing-a-systematic-review-on-accuracy-and-precision-of-data-collection-and-analytical-methods-for-haemoglobin-assessment-in-populations)  
457 [methods-for-haemoglobin-assessment-in-populations](https://www.who.int/news-room/articles-detail/call-for-authors-developing-a-systematic-review-on-accuracy-and-precision-of-data-collection-and-analytical-methods-for-haemoglobin-assessment-in-populations)  
458





460 **Table 1:** Presents the absolute and proportional bias with their corresponding 95%  
461 confidence intervals, for haemoglobin concentration measurements obtained by  
462 HemoCue-301. The absolute bias is expressed in grams per decilitre (g/dL), and the  
463 proportional bias is presented as a percentage (%).

| Aneamia Category | Sysmex Haemoglobin; g/dL | Absolute bias; g/dL (95% CI) | Proportional Bias; % (95% CI) |
|------------------|--------------------------|------------------------------|-------------------------------|
| Severe           | 6.5                      | 1.72 (1.37 to 2.10)          | 26.5 (21.1 to 32.3)           |
| Moderate         | 8.0                      | 1.12 (0.91 to 1.37)          | 14.0 (11.4 to 17.1)           |
| Mild             | 10.0                     | 0.32 (0.26 to 0.42)          | 3.2 (2.6 to 4.2)              |
| normal           | 11.0                     | -0.08 (-0.18 to 0.07)        | -7.3 (-6.5 to 0.6)            |

464

465  
466  
467  
468

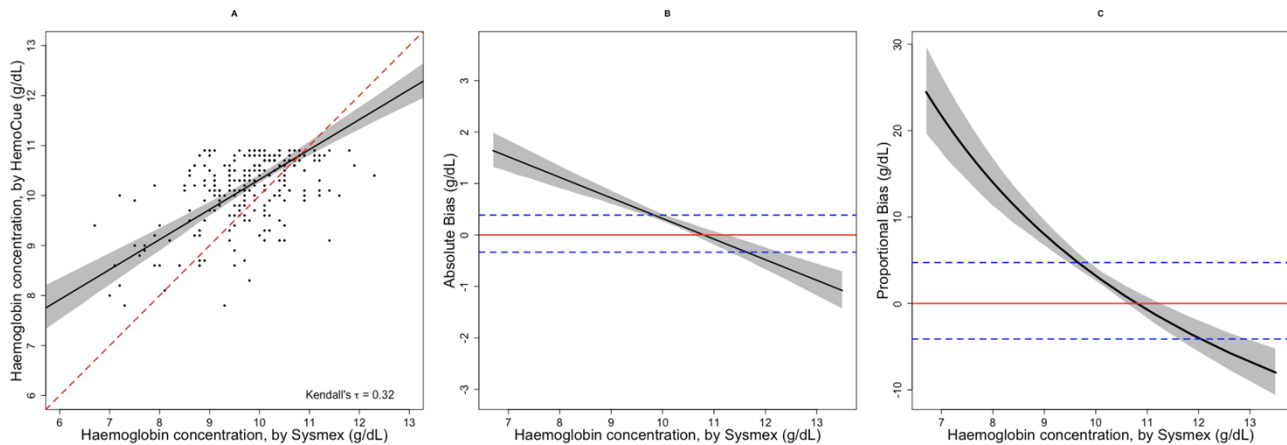

469  
470

**Figure 1 Comparison of haemoglobin concentrations measured by HemoCue 301 vs Sysmex XN-1500.**

471 HemoCue data were truncated at haemoglobin concentration <11.0g/dL (see text)

472 **Panel A:** The black line represents the Passing-Bablok equation: *HaemoCue Haemoglobin*  
473  $= Intercept (4.32) + Slope(0.60) \times Sysmex Haemoglobin$ ; the red dashed line  
474 represents the identity line; the grey shade area indicates the 95% confidence band.

475 **Panel B:** The black line represents the Passing-Bablok equation: *Absolute Bias* =  
476  $HemoCue method(Intercept + Slope \times Sysmex Haemoglobin) -$   
477  $(Sysmex Haemoglobin(reference method))$ ; the red line signifies the zero bias, the blue  
478 dashed line represent  $\pm 7\%$  acceptable difference and the grey shade indicates the 95%  
479 confidence interval.

480 **Panel C:** The black line represents the Passing-Bablok equation: *Proportional bias*( $X_c$ ) =  
481  $\frac{Intercept + (Slope - 1) \times X_c}{X_c}$  where the Intercept represents the constant bias at zero Sysmex  
482 (reference method), Slope reflects the proportional bias, and  $X_c$  denotes the specific  
483 Sysmex value for assessing percentage bias, the numerator combines the constant and  
484 proportional biases and divide it by  $X_c$  to normalizes the bias; The red dashed line signifies  
485 the zero bias, the blue dashed line represent  $\pm 7\%$  acceptable difference, and the grey  
486 shade indicates the 95% confidence interval.

487  
488  
489

1 **Comparison of haemoglobin concentration measurements using HemoCue-301 and**  
2 **Sysmex XN-Series 1500: a survey among anaemic Gambian infants aged 6-12 months**

3

4 Mamadou Bah, MSc<sup>1,2</sup>, Hans Verhoef, PhD<sup>2</sup>, Abdou Camara<sup>1</sup>, SEN, Morris Nden Ngom<sup>1</sup>,  
5 SEN, Demba Jallow<sup>1</sup>, SEN, Kebba Bajo<sup>1</sup>, Foday Bah<sup>1</sup>, Maarten Pleij<sup>2</sup> BSc, Maaïke Klappe<sup>2</sup>  
6 BSc, Alasana Saidykhan<sup>1</sup>, BSc, Emmanuel Okoh, MBBS, MPH<sup>1</sup>, Abdoulie Bah, BSc<sup>1</sup>, Carla  
7 Cerami, MD, PhD<sup>1\*</sup>

8 medRxiv preprint doi: <https://doi.org/10.1101/2024.09.05.24313093>; this version posted September 6, 2024. The copyright holder for this  
preprint (which was not certified by peer review) is the author/funder, who has granted medRxiv a license to display the preprint in  
perpetuity.  
It is made available under a [CC-BY 4.0 International license](https://creativecommons.org/licenses/by/4.0/) .

9 *<sup>1</sup>Medical Research Council (MRC) Unit The Gambia at London School of Hygiene & Tropical  
10 Medicine (LSHTM), PO Box 273, Fajara, The Gambia*

11 *<sup>2</sup>Division of Human Nutrition and Health, Wageningen University, PO Box 17, 6700 AA  
12 Wageningen, The Netherlands*

13 *\*Correspondence to: Dr Carla Cerami at the MRC Unit The Gambia @ LSHTM, Atlantic  
14 Boulevard, Fajara, Banjul, The Gambia Email: [carla.cerami@lshtm.ac.uk](mailto:carla.cerami@lshtm.ac.uk); Tel: +220-  
15 7875756*

16 **Table 1:** Presents the absolute and proportional bias with their corresponding 95%  
17 confidence intervals, for haemoglobin concentration measurements obtained by  
18 HemoCue-301. The absolute bias is expressed in grams per decilitre (g/dL), and the  
19 proportional bias is presented as a percentage (%).

| Aneamia Category | Sysmex Haemoglobin; g/dL | Absolute bias; g/dL (95% CI) | Proportional Bias; % (95% CI) |
|------------------|--------------------------|------------------------------|-------------------------------|
| Severe           | 6.5                      | 1.72 (1.37 to 2.10)          | 26.5 (21.1 to 32.3)           |
| Moderate         | 8.0                      | 1.12 (0.91 to 1.37)          | 14.0 (11.4 to 17.1)           |
| Mild             | 10.0                     | 0.32 (0.26 to 0.42)          | 3.2 (2.6 to 4.2)              |
| normal           | 11.0                     | -0.08 (-0.18 to 0.07)        | -7.3 (-6.5 to 0.6)            |

20

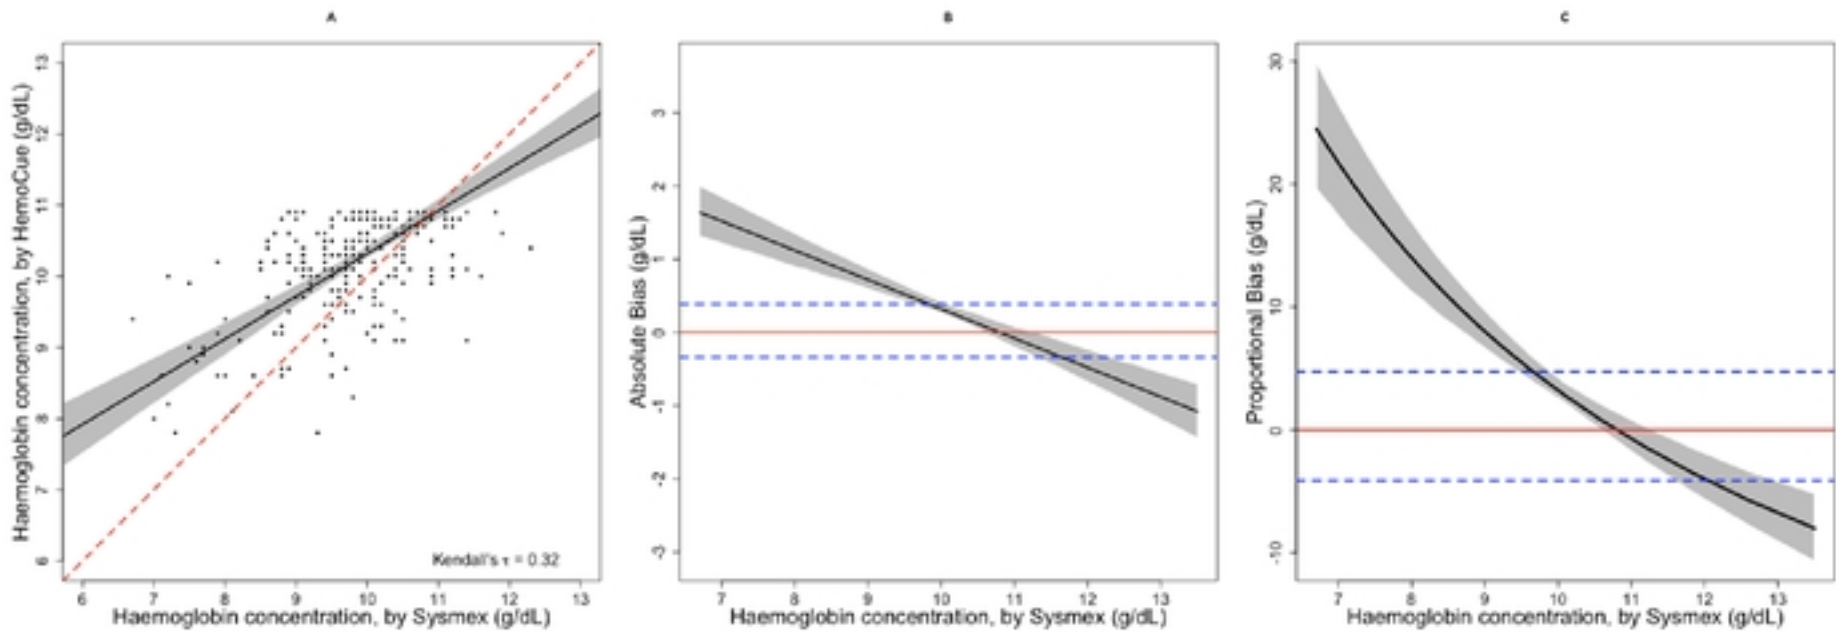

23 medRxiv preprint doi: <https://doi.org/10.1101/2024.09.05.24313093>; this version posted September 6, 2024. The copyright holder for this  
 24 preprint (which was not certified by peer review) is the author/funder, who has granted medRxiv a license to display the preprint in  
 25 permanent form. It is made available under a [CC-BY 4.0 International license](https://creativecommons.org/licenses/by/4.0/).

26 HemoCue data were truncated at haemoglobin concentration <11.0g/dL (see text)

27 **Panel A:** The black line represents the Passing-Bablok equation: *HaemoCue Haemoglobin*  
 28  $= \text{Intercept} (4.32) + \text{Slope}(0.60) \times \text{Sysmex Haemoglobin}$ ; the red dashed line  
 29 represents the identity line; the grey shade area indicates the 95% confidence band.

30 **Panel B:** The black line represents the Passing-Bablok equation: *Absolute Bias* =  
 31  $\text{HemoCue method} (\text{Intercept} + \text{Slope} \times \text{Sysmex Haemoglobin}) -$   
 32  $(\text{Sysmex Haemoglobin}(\text{reference method}))$ ; the red line signifies the zero bias, the blue  
 33 dashed line represent  $\pm 7\%$  acceptable difference and the grey shade indicates the 95%  
 34 confidence interval.

35 **Panel C:** The black line represents the Passing-Bablok equation: *Proportional bias*( $X_c$ ) =  
 36  $\frac{\text{Intercept} + (\text{Slope} - 1) \times X_c}{X_c}$  where the Intercept represents the constant bias at zero Sysmex  
 37 (reference method), Slope reflects the proportional bias, and  $X_c$  denotes the specific  
 38 Sysmex value for assessing percentage bias, the numerator combines the constant and  
 39 proportional biases and divide it by  $X_c$  to normalizes the bias; The red dashed line signifies  
 40 the zero bias, the blue dashed line represent  $\pm 7\%$  acceptable difference, and the grey  
 41 shade indicates the 95% confidence interval.

42  
43
